# Supplementary material
Source: PubMed Central journal article supplement (PMC7908765)

**Figure 1. Flow chart of included patients**

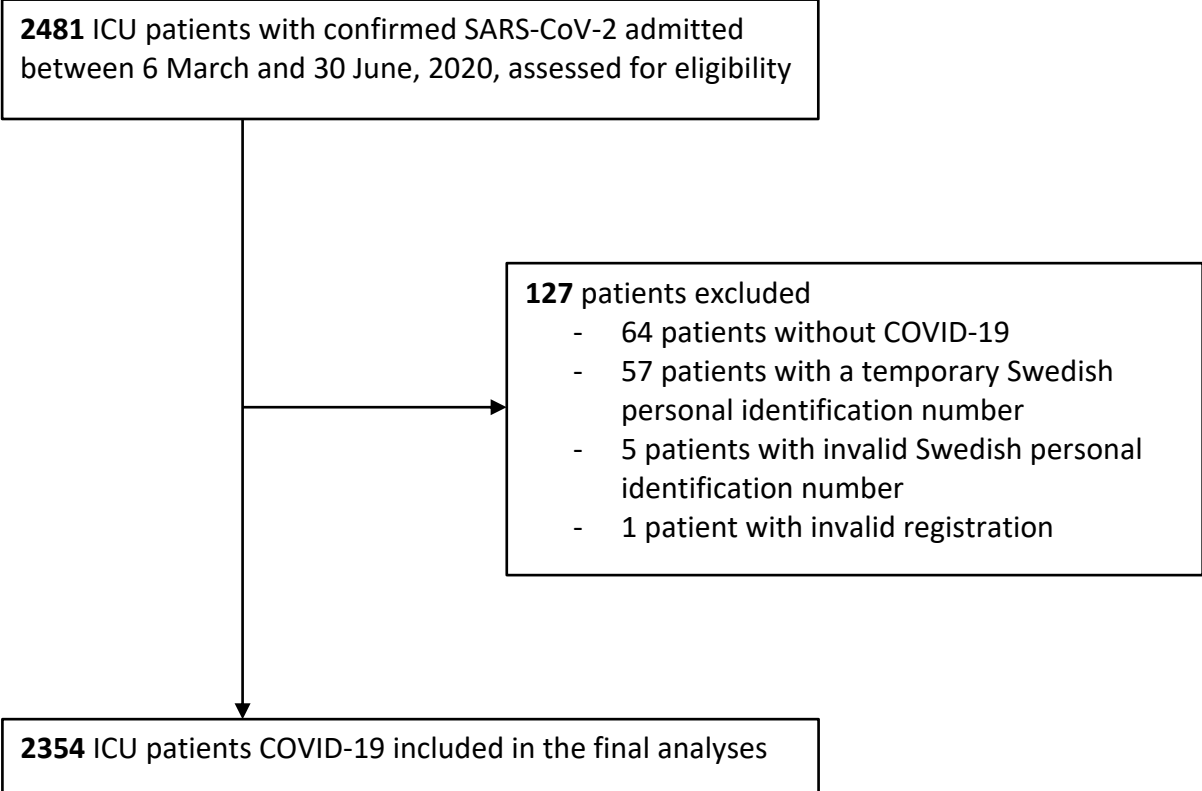

Supplement: 13054_2021_3511_MOESM1_ESM.pdf [file 13054_2021_3511_MOESM1_ESM.pdf]
